# Supplementary material for: Biodegradability of several antipsychotic drugs: manual and automatic assessment
Source: Royal Society of Chemistry journal article supplement (doi:10.1039/c8nj01636d), 2018-01-01
Supplement: c8nj01636d1.pdf [file c8nj01636d1.pdf]

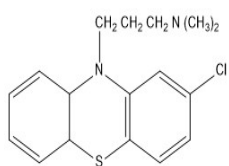

Chlorpromazine

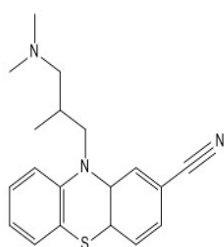

Cyamemazine

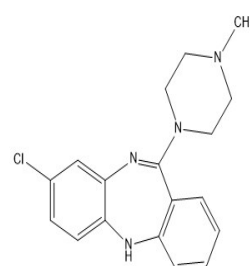

Clozapine

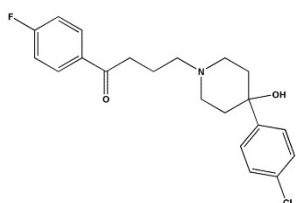

Haloperidol

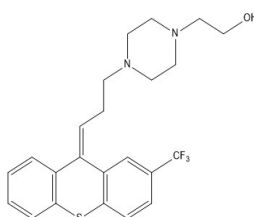

Flupenthixol

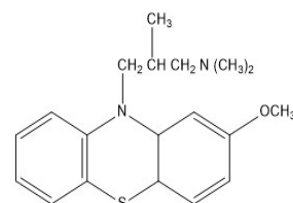

Levomepromazine

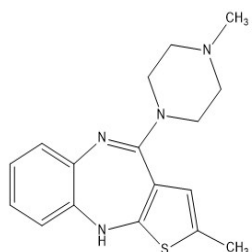

Olanzapine

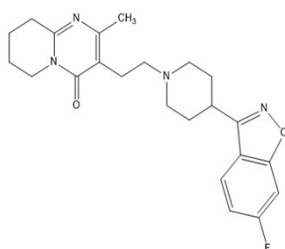

Risperidone

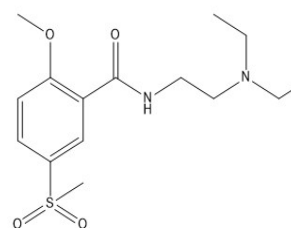

Tiapride

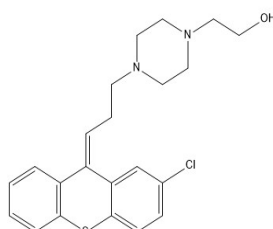

Zuclopenthixol
